# Supplementary material for: Prenatal Lead and Depression Exposures Jointly Influence Birth Outcomes and NR3C1 DNA Methylation
Source: MDPI journal article supplement (doi:10.3390/ijerph182212169), 2021-11-19
Supplement: s1 [file s1]

**Supplemental Table S1. Descriptive information for *NR3C1* methylation factor scores**

| CpG        | Location        | % Methylated | Factor | Factor Loading |
|------------|-----------------|--------------|--------|----------------|
| cg14621978 | Body            | 0.96 ± 0.02  | 1      | 0.91           |
| cg12466613 | TSS1500         | 0.97 ± 0.01  | 1      | 0.83           |
| cg23273257 | 3'UTR           | 0.98 ± 0.01  | 1      | 0.82           |
| cg19176661 | Body            | 0.96 ± 0.02  | 1      | 0.80           |
| cg14438279 | 5'UTR           | 0.95 ± 0.02  | 1      | 0.79           |
| cg00407401 | Body            | 0.93 ± 0.03  | 1      | 0.77           |
| cg05900547 | Body            | 0.90 ± 0.05  | 1      | 0.75           |
| cg05900547 | Body            | 0.90 ± 0.05  | 1      | 0.75           |
| cg07528216 | 5'UTR           | 0.97 ± 0.01  | 1      | 0.74           |
| cg26081259 | 3'UTR           | 0.97 ± 0.01  | 1      | 0.72           |
| cg16535116 | Body            | 0.88 ± 0.04  | 1      | 0.71           |
| cg27345592 | 5'UTR           | 0.97 ± 0.01  | 1      | 0.68           |
| cg21979215 | TSS1500         | 0.83 ± 0.07  | 1      | 0.63           |
| cg07715663 | Body            | 0.96 ± 0.03  | 1      | 0.58           |
| cg19457823 | Body            | 0.94 ± 0.04  | 1      | 0.54           |
| cg24801588 | Body            | 0.94 ± 0.02  | 1      | 0.54           |
| cg00294552 | 5'UTR           | 0.91 ± 0.03  | 1      | 0.48           |
| cg06613263 | Body            | 0.93 ± 0.02  | 1      | 0.47           |
| cg25708981 | Body            | 0.88 ± 0.05  | 1      | 0.47           |
| cg07589972 | TSS1500         | 0.95 ± 0.01  | 1      | 0.42           |
| cg01751279 | 5'UTR           | 0.93 ± 0.02  | 1      | 0.38           |
| cg08845721 | 5'UTR           | 0.97 ± 0.01  | 1      | 0.36           |
| cg25579735 | 5'UTR           | 0.98 ± 0.01  | 1      | 0.36           |
| cg12888360 | Body            | 0.53 ± 0.12  | 1      | 0.35           |
| cg00629244 | TSS200; 5'UTR   | 0.01 ± 0.002 | 1      | -0.32          |
| cg13648501 | TSS1500; 5'UTR  | 0.03 ± 0.01  | 1      | -0.37          |
| cg06952416 | 5'UTR           | 0.07 ± 0.01  | 1      | -0.43          |
| cg14558428 | TSS1500; 5'UTR  | 0.02 ± 0.002 | 1      | -0.47          |
| cg26720913 | 5'UTR; 1stExon  | 0.01 ± 0.005 | 1      | -0.47          |
| cg27122725 | 5'UTR           | 0.06 ± 0.01  | 1      | -0.48          |
| cg08818984 | 1st Exon; 5'UTR | 0.02 ± 0.01  | 1      | -0.52          |
|            |                 |              |        |                |
| cg03746860 | Body            | 0.93 ± 0.07  | 2      | 0.91           |
| cg16224829 | 5'UTR           | 0.86 ± 0.07  | 2      | 0.88           |
| cg25535999 | Body            | 0.95 ± 0.02  | 2      | 0.85           |
| cg01294526 | TSS1500         | 0.95 ± 0.03  | 2      | 0.84           |
| cg12969488 | 5'UTR           | 0.79 ± 0.05  | 2      | 0.77           |
| cg23430507 | 5'UTR           | 0.81 ± 0.04  | 2      | 0.67           |
| cg20728768 | Body            | 0.67 ± 0.10  | 2      | 0.56           |
| cg16594263 | Body            | 0.97 ± 0.01  | 2      | 0.45           |
| cg07589972 | TSS1500         | 0.95 ± 0.01  | 2      | 0.42           |
| cg14438279 | 5'UTR           | 0.95 ± 0.02  | 2      | 0.41           |

|            |                          |                  |   |       |
|------------|--------------------------|------------------|---|-------|
| cg24052866 | Body                     | $0.86 \pm 0.04$  | 2 | 0.41  |
| cg25579735 | 5'UTR                    | $0.98 \pm 0.01$  | 2 | 0.39  |
| cg13764763 | TSS1500; 5'UTR           | $0.95 \pm 0.02$  | 2 | 0.38  |
| cg07528216 | 5'UTR                    | $0.97 \pm 0.01$  | 2 | 0.33  |
| cg12741214 | Body                     | $0.97 \pm 0.01$  | 2 | 0.32  |
| cg23776787 | 5'UTR; 1stExon           | $0.02 \pm 0.005$ | 2 | -0.38 |
| cg08818984 | 1stExon; 5'UTR           | $0.02 \pm 0.01$  | 2 | -0.56 |
| cg03906910 | 5'UTR; 1stExon           | $0.15 \pm 0.07$  | 2 | -0.75 |
| cg15115787 | Body                     | $0.43 \pm 0.12$  | 2 | -0.80 |
| cg15910486 | TSS1500; 5'UTR           | $0.02 \pm 0.004$ | 3 | 0.65  |
| cg18019515 | TSS200; 5'UTR            | $0.01 \pm 0.001$ | 3 | 0.52  |
| cg14939152 | TSS1500; 5'UTR           | $0.02 \pm 0.002$ | 3 | 0.51  |
| cg17617527 | 5'UTR                    | $0.02 \pm 0.002$ | 3 | 0.48  |
| cg21209684 | TSS1500; 5'UTR           | $0.02 \pm 0.002$ | 3 | 0.48  |
| cg17860381 | TSS1500; 5'UTR           | $0.01 \pm 0.003$ | 3 | 0.45  |
| cg18068240 | TSS1500; 5'UTR           | $0.01 \pm 0.002$ | 3 | 0.43  |
| cg01967637 | TSS1500; 5'UTR; 1st Exon | $0.07 \pm 0.03$  | 3 | 0.41  |
| cg04111177 | TSS1500; 5'UTR           | $0.02 \pm 0.006$ | 3 | 0.41  |
| cg10847032 | TSS1500; 5'UTR           | $0.02 \pm 0.004$ | 3 | 0.40  |
| cg14558428 | TSS1500; 5'UTR           | $0.02 \pm 0.002$ | 3 | 0.40  |
| cg18146873 | 5'UTR; 1st Exon          | $0.02 \pm 0.004$ | 3 | 0.38  |
| cg16335926 | TSS1500; 5'UTR           | $0.01 \pm 0.002$ | 3 | 0.35  |
| cg18849621 | TSS1500; 5'UTR           | $0.02 \pm 0.003$ | 3 | 0.34  |
| cg06968181 | TSS1500; 5'UTR           | $0.05 \pm 0.01$  | 3 | 0.31  |
| cg15645634 | TSS1500; 5'UTR           | $0.01 \pm 0.002$ | 3 | 0.31  |
| cg11152298 | TSS200; 5'UTR            | $0.02 \pm 0.01$  | 3 | 0.30  |
| cg19645279 | Body                     | $0.69 \pm 0.06$  | 3 | -0.44 |
| cg17342132 | Body                     | $0.92 \pm 0.04$  | 4 | 0.81  |
| cg22233604 | Body                     | $0.78 \pm 0.05$  | 4 | 0.79  |
| cg18998365 | 5'UTR                    | $0.59 \pm 0.04$  | 4 | 0.34  |
| cg20728768 | Body                     | $0.67 \pm 0.10$  | 4 | -0.34 |
| cg15115787 | Body                     | $0.43 \pm 0.12$  | 4 | -0.44 |
| cg03857453 | Body                     | $0.97 \pm 0.02$  | 5 | 0.55  |
| cg08695103 | Body                     | $0.74 \pm 0.08$  | 5 | 0.48  |
| cg18718518 | TSS1500; 5'UTR           | $0.75 \pm 0.03$  | 5 | 0.44  |
| cg20728768 | Body                     | $0.67 \pm 0.10$  | 5 | 0.42  |
| cg24052866 | Body                     | $0.86 \pm 0.04$  | 5 | 0.42  |
| cg21702128 | TSS1500; 5'UTR           | $0.05 \pm 0.01$  | 5 | 0.38  |
| cg11152298 | TSS200; 5'UTR            | $0.02 \pm 0.01$  | 5 | 0.34  |
| cg07742588 | 5'UTR                    | $0.84 \pm 0.07$  | 6 | 0.67  |
| cg17349736 | 5'UTR                    | $0.93 \pm 0.02$  | 6 | 0.67  |

|            |                |                  |   |       |
|------------|----------------|------------------|---|-------|
| cg00294552 | 5'UTR          | $0.91 \pm 0.03$  | 6 | 0.44  |
| cg24801588 | Body           | $0.94 \pm 0.02$  | 6 | 0.43  |
| cg25708981 | Body           | $0.88 \pm 0.05$  | 6 | 0.43  |
| cg05483455 | Body           | $0.98 \pm 0.02$  | 6 | 0.41  |
| cg20598211 | Body           | $0.96 \pm 0.01$  | 6 | 0.34  |
| cg18068240 | TSS1500; 5'UTR | $0.01 \pm 0.002$ | 6 | 0.33  |
| cg15645634 | TSS1500; 5'UTR | $0.01 \pm 0.002$ | 6 | 0.31  |
| cg21979215 | TSS1500        | $0.83 \pm 0.07$  | 6 | 0.31  |
| cg16335926 | TSS1500; 5'UTR | $0.01 \pm 0.002$ | 6 | -0.42 |
| cg27122725 | 5'UTR          | $0.06 \pm 0.01$  | 6 | -0.49 |

---

The proportion of variance explained in methylation by factors 1 through 6 was 0.36, 0.24, 0.12, 0.08, 0.07, and 0.13 respectively.

Supplemental Table S2. Multivariable linear regression models testing the joint contribution of depressive symptoms and lead exposure during pregnancy on birth and infant outcomes (n=258)<sup>^</sup>

|                            | Model 1               | Model 2                | Model 3                | Model 4                |
|----------------------------|-----------------------|------------------------|------------------------|------------------------|
| <b>Gestational Age</b>     |                       |                        |                        |                        |
| Depression                 | -0.05 (0.02)<br>0.05  |                        | -0.05 (0.02)<br>0.04   | -0.02 (0.02)<br>0.41   |
| Lead                       |                       | 0.23 (0.27)<br>0.39    | 0.24 (0.27)<br>0.37    | 0.86 (0.03)<br>0.10    |
| Depression x Lead          |                       |                        |                        | -0.07 (0.05)<br>0.15   |
| <b>Birth Weight</b>        |                       |                        |                        |                        |
| Depression                 | -5.46 (6.84)<br>0.43  |                        | -5.43 (6.85)<br>0.43   | 3.70 (8.37)<br>0.66    |
| Lead                       |                       | -22.78 (80.43)<br>0.78 | -22.03 (80.49)<br>0.78 | 213.23 (8.37)<br>0.15  |
| Depression x Lead          |                       |                        |                        | -26.39 (14.03)<br>0.06 |
| <b>Birth Length</b>        |                       |                        |                        |                        |
| Depression                 | -0.07 (0.04)<br>0.07  |                        | -0.07 (0.04)<br>0.07   | -0.01 (0.04)<br>0.81   |
| Lead                       |                       | -0.12 (0.42)<br>0.77   | -0.11 (0.42)<br>0.79   | 1.29 (0.78)<br>0.10    |
| Depression x Lead          |                       |                        |                        | -0.16 (0.07)<br>0.03   |
| <b>Head Circumference</b>  |                       |                        |                        |                        |
| Depression                 | -0.04 (0.02)<br>0.07  |                        | -0.04 (0.02)<br>0.07   | -0.01 (0.03)<br>0.79   |
| Lead                       |                       | -0.26 (0.27)<br>0.34   | -0.24 (0.27)<br>0.38   | 0.65 (0.51)<br>0.20    |
| Depression x Lead          |                       |                        |                        | -0.10 (0.05)<br>0.04   |
| <b>Cephalization Index</b> |                       |                        |                        |                        |
| Depression                 | 0.001 (0.002)<br>0.83 |                        | 0.001 (0.02)<br>0.83   | -0.004 (0.003)<br>0.24 |
| Lead                       |                       | -0.003 (0.03)<br>0.91  | -0.003 (0.03)<br>0.91  | -0.11 (0.05)<br>0.04   |
| Depression x Lead          |                       |                        |                        | 0.01 (0.01)<br>0.02    |

<sup>^</sup>Top cell entries are  $\beta$  (SE); bottom cell entry is the p-value for that model parameter.  
Depression is treated continuously.
